# Supplementary material for: Genetic confirmation of Octopus insularis (Leite and Haimovici, 2008) in South Florida, United States using physical features and de novo genome assembly
Source: Front Physiol. 2023 Jun 20;14:1162807. doi: 10.3389/fphys.2023.1162807 (PMC10318165; doi:10.3389/fphys.2023.1162807)
Supplement: Supplementary file 2 [file Table1.xlsx]

## Sheet: Sheet1
	Specimen A	Specimen B	Specimen C
Estimated Genome Size	1353905820	1500084924	1469261394
Phred Score (QV)	25.2809	25.2997	25.2809
